# Supplementary material for: A gut microbiome signature for cirrhosis due to nonalcoholic fatty liver disease
Source: PubMed Central journal article supplement (PMC6440960; doi:10.1038/s41467-019-09455-9), 2019-03-29
Supplement: 41467_2019_9455_MOESM2_ESM.pdf [file 41467_2019_9455_MOESM2_ESM.pdf]

## Description of Additional Supplementary Files

Supplementary Data 1: Primers sequences.
